# Supplementary material for: Tumor-immune hybrid cells evade the immune response and potentiate colorectal cancer metastasis through CTLA4
Source: Clin Exp Med. 2024 Nov 5;25(1):2. doi: 10.1007/s10238-024-01515-9 (PMC11538261; doi:10.1007/s10238-024-01515-9)
Supplement: Supplementary file 1 — Supplementary file1 (XLSX 33 KB) [file 10238_2024_1515_MOESM1_ESM.xlsx]

## Sheet: Colorectal cancer site P21
DEG between spots with a gene feature of THC *CD68 or CD4 with CTLA4 ) and spots with a gene feature of tumor-immune cells (CD3D, CD3E or CD3G)
FeatureID	FeatureName	CD3 Average	CD3 Log2 Fold Change	CD3 P-Value	CD68 or CD4 with CTLA4 Average	CD68 or CD4with CTLA4 Log2 Fold Change	CD68 or CD4 with CTLA4 P-Value
ENSG00000129226	CD68	0	-8.13607	1.64643e-41	1.1262	8.13607	1.64643e-41
ENSG00000010610	CD4	0	-7.2111	6.44235e-28	0.591256	7.2111	6.44235e-28
ENSG00000163599	CTLA4	0.0160701	-4.6455	2.82048e-19	0.498746	4.6455	2.82048e-19
ENSG00000187498	COL4A1	2.32615	-1.76499	1.07611e-10	7.91558	1.76499	1.07611e-10
ENSG00000145824	CXCL14	0.377648	-2.17326	1.65724e-10	1.71746	2.17326	1.65724e-10
ENSG00000159189	C1QC	0.417824	-1.81878	8.79581e-09	1.48417	1.81878	8.79581e-09
ENSG00000173369	C1QB	0.257122	-1.97928	1.49665e-08	1.02565	1.97928	1.49665e-08
ENSG00000016490	CLCA1	6.07049	1.82588	3.04475e-08	1.70941	-1.82588	3.04475e-08
ENSG00000106991	ENG	0.349525	-1.80431	3.04475e-08	1.23078	1.80431	3.04475e-08
ENSG00000076706	MCAM	0.55442	-1.69969	3.04475e-08	1.80997	1.69969	3.04475e-08
ENSG00000163453	IGFBP7	2.41052	-1.44285	2.6454e-07	6.56012	1.44285	2.6454e-07
ENSG00000185585	OLFML2A	0.112491	-2.12095	2.6454e-07	0.502768	2.12095	2.6454e-07
ENSG00000151468	CCDC3	0.0482104	-2.64106	2.6454e-07	0.321772	2.64106	2.6454e-07
ENSG00000187908	DMBT1	3.74434	1.63527	6.33279e-07	1.20262	-1.63527	6.33279e-07
ENSG00000198788	MUC2	6.32762	1.48855	6.39344e-07	2.2524	-1.48855	6.39344e-07
ENSG00000179914	ITLN1	0.393718	2.30578	6.63967e-07	0.0764208	-2.30578	6.63967e-07
ENSG00000198959	TGM2	0.172754	-1.8551	8.14904e-07	0.635499	1.8551	8.14904e-07
ENSG00000116962	NID1	0.26114	-1.6715	1.2657e-06	0.840629	1.6715	1.2657e-06
ENSG00000123243	ITIH5	0.0482104	-2.58661	1.2657e-06	0.309705	2.58661	1.2657e-06
ENSG00000110799	VWF	0.192842	-1.80479	6.94315e-06	0.683765	1.80479	6.94315e-06
ENSG00000122711	SPINK4	3.35866	1.38101	9.00218e-06	1.28709	-1.38101	9.00218e-06
ENSG00000019582	CD74	4.49562	-1.24577	1.23776e-05	10.6667	1.24577	1.23776e-05
ENSG00000175899	A2M	1.43828	-1.30334	1.23776e-05	3.55558	1.30334	1.23776e-05
ENSG00000134871	COL4A2	2.83236	-1.28967	1.35955e-05	6.93016	1.28967	1.35955e-05
ENSG00000104368	PLAT	0.200877	-1.62384	2.58668e-05	0.627455	1.62384	2.58668e-05
ENSG00000134193	REG4	2.02484	1.38603	2.64657e-05	0.772252	-1.38603	2.64657e-05
ENSG00000134028	ADAMDEC1	0.0843682	-2.01795	2.64657e-05	0.353949	2.01795	2.64657e-05
ENSG00000143248	RGS5	1.12491	-1.41797	2.67471e-05	3.01259	1.41797	2.67471e-05
ENSG00000162511	LAPTM5	0.357561	-1.49279	3.36213e-05	1.01358	1.49279	3.36213e-05
ENSG00000185269	NOTUM	0.0682981	-2.11713	3.36213e-05	0.309705	2.11713	3.36213e-05
ENSG00000162745	OLFML2B	0.204894	-1.66753	4.53718e-05	0.659632	1.66753	4.53718e-05
ENSG00000204472	AIF1	0.144631	-1.69909	6.38695e-05	0.478635	1.69909	6.38695e-05
ENSG00000182871	COL18A1	1.02045	-1.2927	6.38695e-05	2.5058	1.2927	6.38695e-05
ENSG00000173372	C1QA	0.30935	-1.48443	6.79099e-05	0.872806	1.48443	6.79099e-05
ENSG00000170962	PDGFD	0.0723156	-2.07565	6.79099e-05	0.31775	2.07565	6.79099e-05
ENSG00000142173	COL6A2	2.52301	-1.18653	6.79099e-05	5.74765	1.18653	6.79099e-05
ENSG00000152661	GJA1	0.329438	-1.46581	7.182e-05	0.917049	1.46581	7.182e-05
ENSG00000158869	FCER1G	0.168736	-1.61978	7.46547e-05	0.526901	1.61978	7.46547e-05
ENSG00000174059	CD34	0.104456	-1.81662	9.73131e-05	0.378082	1.81662	9.73131e-05
ENSG00000100985	MMP9	0.401753	-1.54801	0.000103736	1.18251	1.54801	0.000103736
ENSG00000087303	NID2	0.212929	-1.51355	0.000126484	0.615388	1.51355	0.000126484
ENSG00000154096	THY1	0.811542	-1.29051	0.000134757	1.99096	1.29051	0.000134757
ENSG00000174992	ZG16	0.691016	2.18505	0.000134757	0.148819	-2.18505	0.000134757
ENSG00000166825	ANPEP	7.56903	1.12381	0.000137291	3.47111	-1.12381	0.000137291
ENSG00000275395	FCGBP	8.15158	1.18795	0.000150883	3.57569	-1.18795	0.000150883
ENSG00000007306	CEACAM7	0.373631	1.79805	0.000155845	0.104576	-1.79805	0.000155845
ENSG00000130508	PXDN	0.301315	-1.46797	0.000206904	0.840629	1.46797	0.000206904
ENSG00000174807	CD248	0.433894	-1.29955	0.000212559	1.07391	1.29955	0.000212559
ENSG00000134013	LOXL2	0.699051	-1.23694	0.00023243	1.6531	1.23694	0.00023243
ENSG00000102265	TIMP1	1.82798	-1.10981	0.00023243	3.94975	1.10981	0.00023243
ENSG00000147065	MSN	0.445946	-1.33895	0.00023243	1.13425	1.33895	0.00023243
ENSG00000125810	CD93	0.0964208	-1.91238	0.000314622	0.37406	1.91238	0.000314622
ENSG00000189184	PCDH18	0.172754	-1.57564	0.000405188	0.522879	1.57564	0.000405188
ENSG00000026025	VIM	6.82579	-1.03851	0.00051661	14.0252	1.03851	0.00051661
ENSG00000188487	INSC	0.0241052	-2.55185	0.00051661	0.160886	2.55185	0.00051661
ENSG00000011600	TYROBP	0.373631	-1.31125	0.000671172	0.933138	1.31125	0.000671172
ENSG00000102575	ACP5	0.132579	-1.7086	0.00067511	0.442436	1.7086	0.00067511
ENSG00000115461	IGFBP5	0.58656	-1.2655	0.000703284	1.4158	1.2655	0.000703284
ENSG00000250722	SELENOP	0.180789	-1.58661	0.000730711	0.551034	1.58661	0.000730711
ENSG00000142156	COL6A1	2.67166	-1.06314	0.000730711	5.58676	1.06314	0.000730711
ENSG00000135744	AGT	0.216947	-1.37004	0.000940425	0.567123	1.37004	0.000940425
ENSG00000103241	FOXF1	0.156684	-1.62224	0.000940425	0.490702	1.62224	0.000940425
ENSG00000130203	APOE	1.84405	-1.15193	0.000986795	4.10259	1.15193	0.000986795
ENSG00000135047	CTSL	0.233017	-1.47656	0.000999113	0.65561	1.47656	0.000999113
ENSG00000179603	GRM8	0.0924033	-1.70209	0.00105692	0.309705	1.70209	0.00105692
ENSG00000091428	RAPGEF4	0.00401753	-3.58661	0.00109113	0.0925094	3.58661	0.00109113
ENSG00000161281	COX7A1	0.0924033	-1.809	0.00118282	0.333838	1.809	0.00118282
ENSG00000138792	ENPEP	0.120526	-1.57101	0.00119027	0.366015	1.57101	0.00119027
ENSG00000127951	FGL2	0.136596	-1.57281	0.00119027	0.414281	1.57281	0.00119027
ENSG00000170498	KISS1	2.16143	1.07249	0.00126298	1.02565	-1.07249	0.00126298
ENSG00000186998	EMID1	0.0321403	-2.25799	0.00150125	0.16893	2.25799	0.00150125
ENSG00000104327	CALB1	0.58656	1.5256	0.00156593	0.201107	-1.5256	0.00156593
ENSG00000170458	CD14	0.289262	-1.35098	0.00168357	0.744097	1.35098	0.00168357
ENSG00000113140	SPARC	9.29657	-1.0004	0.00174988	18.6024	1.0004	0.00174988
ENSG00000107796	ACTA2	1.37801	-1.10871	0.00174988	2.97639	1.10871	0.00174988
ENSG00000066230	SLC9A3	0.514244	1.36572	0.00177917	0.197085	-1.36572	0.00177917
ENSG00000161544	CYGB	0.204894	-1.40973	0.00199729	0.551034	1.40973	0.00199729
ENSG00000188153	COL4A5	0.0321403	-2.22404	0.00206068	0.164908	2.22404	0.00206068
ENSG00000137507	LRRC32	0.112491	-1.55306	0.002179	0.33786	1.55306	0.002179
ENSG00000163430	FSTL1	0.811542	-1.14044	0.00243058	1.79388	1.14044	0.00243058
ENSG00000134460	IL2RA	0.0401753	-2.06578	0.00264047	0.180997	2.06578	0.00264047
ENSG00000111799	COL12A1	0.783419	-1.12841	0.00313815	1.71746	1.12841	0.00313815
ENSG00000074181	NOTCH3	1.145	-1.03899	0.0033508	2.35698	1.03899	0.0033508
ENSG00000203883	SOX18	0.0763332	-1.86955	0.00415711	0.289595	1.86955	0.00415711
ENSG00000162493	PDPN	0.136596	-1.60029	0.00425312	0.422325	1.60029	0.00425312
ENSG00000100097	LGALS1	2.97699	-0.983058	0.00446822	5.88842	0.983058	0.00446822
ENSG00000166278	C2	0.470052	-1.06737	0.00465714	0.989448	1.06737	0.00465714
ENSG00000196924	FLNA	0.437911	-1.15693	0.00508675	0.981404	1.15693	0.00508675
ENSG00000162552	WNT4	0.0401753	-2.00165	0.00537144	0.172952	2.00165	0.00537144
ENSG00000077943	ITGA8	0.0200877	-2.41669	0.00552005	0.124687	2.41669	0.00552005
ENSG00000188175	HEPACAM2	0.425859	1.3475	0.00556737	0.164908	-1.3475	0.00556737
ENSG00000122861	PLAU	0.470052	-1.1634	0.00556737	1.05782	1.1634	0.00556737
ENSG00000165457	FOLR2	0.0482104	-1.88617	0.00576879	0.189041	1.88617	0.00576879
ENSG00000115386	REG1A	0.522279	2.44681	0.00671969	0.0925094	-2.44681	0.00671969
ENSG00000005249	PRKAR2B	1.5347	0.987095	0.00672061	0.772252	-0.987095	0.00672061
ENSG00000185989	RASA3	0.116508	-1.57049	0.00743109	0.353949	1.57049	0.00743109
ENSG00000001617	SEMA3F	0.237035	-1.19279	0.00780476	0.547012	1.19279	0.00780476
ENSG00000167286	CD3D	0.409789	1.51493	0.00780476	0.140775	-1.51493	0.00780476
ENSG00000105971	CAV2	0.317385	-1.17157	0.00801481	0.719964	1.17157	0.00801481
ENSG00000090659	CD209	0.0522279	-1.809	0.00804117	0.193063	1.809	0.00804117
ENSG00000155659	VSIG4	0.0321403	-2.07965	0.00817162	0.148819	2.07965	0.00817162
ENSG00000169439	SDC2	0.273192	-1.15051	0.00837944	0.611366	1.15051	0.00837944
ENSG00000213949	ITGA1	0.478087	-1.08344	0.00843355	1.0176	1.08344	0.00843355
ENSG00000165168	CYBB	0.172754	-1.27014	0.0100823	0.422325	1.27014	0.0100823
ENSG00000115414	FN1	6.49234	-0.90955	0.0101871	12.1992	0.90955	0.0101871
ENSG00000050165	DKK 3.00	0.530315	-1.19429	0.0102035	1.21871	1.19429	0.0102035
ENSG00000171388	APLN	0.0120526	-2.6455	0.0110382	0.0965315	2.6455	0.0110382
ENSG00000102755	FLT1	0.30935	-1.30121	0.0120234	0.76823	1.30121	0.0120234
ENSG00000213694	S1PR3	0.116508	-1.55419	0.0124394	0.349927	1.55419	0.0124394
ENSG00000168685	IL7R	0.233017	-1.18509	0.0127443	0.534946	1.18509	0.0127443
ENSG00000138080	EMILIN1	0.437911	-1.12718	0.0130309	0.961293	1.12718	0.0130309
ENSG00000130300	PLVAP	0.381666	-1.10319	0.0130795	0.82454	1.10319	0.0130795
ENSG00000164176	EDIL3	0.152666	-1.2861	0.0135754	0.378082	1.2861	0.0135754
ENSG00000164220	F2RL2	0.0321403	-2.25799	0.0138472	0.16893	2.25799	0.0138472
ENSG00000109610	SOD3	0.719139	-1.15365	0.0141432	1.60484	1.15365	0.0141432
ENSG00000134853	PDGFRA	0.0723156	-1.58661	0.0141432	0.22524	1.58661	0.0141432
ENSG00000124225	PMEPA1	0.457999	-0.989049	0.0152697	0.913027	0.989049	0.0152697
ENSG00000154856	APCDD1	0.606648	-0.996895	0.015279	1.21469	0.996895	0.015279
ENSG00000102837	OLFM4	50.7615	0.827361	0.0153092	28.6055	-0.827361	0.0153092
ENSG00000114251	WNT5A	0.172754	-1.25646	0.0159916	0.418303	1.25646	0.0159916
ENSG00000275385	CCL18	0.0200877	-2.27467	0.0162268	0.11262	2.27467	0.0162268
ENSG00000185201	IFITM2	0.257122	-1.10856	0.0166948	0.559078	1.10856	0.0166948
ENSG00000090104	RGS1	0.289262	-1.14274	0.0173155	0.643543	1.14274	0.0173155
ENSG00000124491	F13A1	0.0441929	-1.809	0.0176531	0.164908	1.809	0.0176531
ENSG00000169744	LDB2	0.0482104	-1.79306	0.0179104	0.176974	1.79306	0.0179104
ENSG00000121361	KCNJ8	0.0682981	-1.58661	0.0179274	0.213174	1.58661	0.0179274
ENSG00000066336	SPI1	0.29328	-1.27601	0.0179302	0.715942	1.27601	0.0179302
ENSG00000149564	ESAM	0.060263	-1.6455	0.0179302	0.197085	1.6455	0.0179302
ENSG00000106333	PCOLCE	0.405771	-1.09741	0.0193265	0.872806	1.09741	0.0193265
ENSG00000111186	WNT5B	0.0160701	-2.38016	0.0197257	0.100554	2.38016	0.0197257
ENSG00000167641	PPP1R14A	0.0642806	-1.86838	0.0198676	0.245351	1.86838	0.0198676
ENSG00000126583	PRKCG	0.132579	2.08581	0.0207193	0.028155	-2.08581	0.0207193
ENSG00000020181	ADGRA2	0.241052	-1.17944	0.0216865	0.551034	1.17944	0.0216865
ENSG00000003436	TFPI	0.060263	-1.61636	0.0235685	0.193063	1.61636	0.0235685
ENSG00000029559	IBSP	0.00803507	-4.43905	0.0235685	0.257417	4.43905	0.0235685
ENSG00000136960	ENPP2	0.0522279	-1.68615	0.0236493	0.176974	1.68615	0.0236493
ENSG00000041982	TNC	0.321403	-1.14561	0.0252731	0.715942	1.14561	0.0252731
ENSG00000182492	BGN	1.48649	-0.892638	0.0261172	2.76321	0.892638	0.0261172
ENSG00000151790	TDO2	0.108473	-1.51622	0.0278603	0.31775	1.51622	0.0278603
ENSG00000211448	DIO2	0.164719	-1.25319	0.0280121	0.398193	1.25319	0.0280121
ENSG00000143226	FCGR2A	0.192842	-1.18135	0.0283676	0.442436	1.18135	0.0283676
ENSG00000038427	VCAN	1.16107	-0.901224	0.0286686	2.17196	0.901224	0.0286686
ENSG00000134954	ETS1	0.851717	-0.896296	0.029619	1.58875	0.896296	0.029619
ENSG00000106541	AGR2	7.96275	0.804615	0.0312307	4.55709	-0.804615	0.0312307
ENSG00000095370	SH2D3C	0.0522279	-1.65373	0.0312502	0.172952	1.65373	0.0312502
ENSG00000204262	COL5A2	1.50658	-0.87542	0.0314559	2.76724	0.87542	0.0314559
ENSG00000160255	ITGB2	0.140614	-1.32358	0.0314559	0.357971	1.32358	0.0314559
ENSG00000064042	LIMCH1	0.0200877	-2.17157	0.0329737	0.104576	2.17157	0.0329737
ENSG00000064989	CALCRL	0.116508	-1.39854	0.0337088	0.313727	1.39854	0.0337088
ENSG00000101825	MXRA5	0.208912	-1.16855	0.0341445	0.474613	1.16855	0.0341445
ENSG00000173546	CSPG4	0.128561	-1.43299	0.0343594	0.353949	1.43299	0.0343594
ENSG00000197629	MPEG1	0.128561	-1.2971	0.03513	0.321772	1.2971	0.03513
ENSG00000198223	CSF2RA	0.0924033	-1.43905	0.0357591	0.257417	1.43905	0.0357591
ENSG00000150687	PRSS23	1.71549	-0.803214	0.036367	2.9965	0.803214	0.036367
ENSG00000176678	FOXL1	0.0281227	-1.95584	0.0381078	0.120664	1.95584	0.0381078
ENSG00000162998	FRZB	0.373631	-1.01692	0.0402803	0.760186	1.01692	0.0402803
ENSG00000113361	CDH6	0.0522279	-1.65373	0.0410678	0.172952	1.65373	0.0410678
ENSG00000173467	AGR3	0.457999	1.08895	0.0427896	0.213174	-1.08895	0.0427896
ENSG00000196329	GIMAP5	0.0281227	-1.95584	0.0458758	0.120664	1.95584	0.0458758
ENSG00000163909	HEYL	0.0682981	-1.71437	0.0469349	0.233285	1.71437	0.0469349
ENSG00000010327	STAB1	0.148649	-1.22945	0.0469349	0.353949	1.22945	0.0469349
ENSG00000166927	MS4A7	0.136596	-1.3318	0.0469349	0.349927	1.3318	0.0469349
ENSG00000088882	CPXM1	0.128561	-1.2971	0.0469349	0.321772	1.2971	0.0469349
ENSG00000095794	CREM	0.337473	-1.0352	0.0480272	0.695831	1.0352	0.0480272
ENSG00000143387	CTSK	0.482104	-0.940766	0.0493142	0.929116	0.940766	0.0493142
ENSG00000138079	SLC3A1	0.494157	1.04566	0.0493142	0.237307	-1.04566	0.0493142
ENSG00000069122	ADGRF5	0.108473	-1.4797	0.0493142	0.309705	1.4797	0.0493142

## Sheet: Liver metastasis site P21
DEG between spots with a gene feature of THC *CD68 or CD4 with CTLA4 ) and spots with a gene feature of tumor-immune cells (CD3D, CD3E or CD3G)
FeatureID	FeatureName	CD3 Average	CD3 Log2 Fold Change	CD3 P-Value	CD68 or CD4 with CTLA4 Average	CD68 or CD4 with CTLA4 Log2 Fold Change	CD68 or CD4 with CTLA4 P-Value
ENSG00000129226	CD68	0	-7.55685	8.70169e-45	2.28871	7.55685	8.70169e-45
ENSG00000010610	CD4	0	-6.55461	5.52314e-25	1.1408	6.55461	5.52314e-25
ENSG00000163599	CTLA4	0.0982371	-3.03105	1.57575e-11	0.892027	3.03105	1.57575e-11
ENSG00000216490	IFI30	1.60863	-1.31501	4.01406e-08	3.99457	1.31501	4.01406e-08
ENSG00000159189	C1QC	1.01921	-1.38405	8.01384e-08	2.66542	1.38405	8.01384e-08
ENSG00000100985	MMP9	0.294711	-2.12287	1.61536e-07	1.32205	2.12287	1.61536e-07
ENSG00000019582	CD74	12.3779	-1.00757	6.50383e-06	24.6924	1.00757	6.50383e-06
ENSG00000136235	GPNMB	1.04377	-1.21739	3.39287e-05	2.43086	1.21739	3.39287e-05
ENSG00000140678	ITGAX	0.564863	-1.39703	3.54617e-05	1.5033	1.39703	3.54617e-05
ENSG00000115009	CCL20	1.96474	-1.16774	7.2018e-05	4.39972	1.16774	7.2018e-05
ENSG00000164733	CTSB	6.00474	-0.883245	0.000134239	10.9993	0.883245	0.000134239
ENSG00000173372	C1QA	0.761338	-1.18305	0.000255261	1.73785	1.18305	0.000255261
ENSG00000025708	TYMP	1.00693	-1.09421	0.000279741	2.15366	1.09421	0.000279741
ENSG00000196878	LAMB3	2.34541	-0.9345	0.000430803	4.46369	0.9345	0.000430803
ENSG00000136167	LCP1	1.04377	-1.09205	0.000451599	2.22829	1.09205	0.000451599
ENSG00000165168	CYBB	0.319271	-1.46881	0.000629932	0.906242	1.46881	0.000629932
ENSG00000275385	CCL18	0.0613982	-2.39362	0.000979404	0.380266	2.39362	0.000979404
ENSG00000130203	APOE	15.7179	-0.879349	0.000979404	28.6835	0.879349	0.000979404
ENSG00000122862	SRGN	2.33313	-0.921225	0.00145057	4.39972	0.921225	0.00145057
ENSG00000138755	CXCL9	0.0736778	-2.38212	0.00164536	0.440683	2.38212	0.00164536
ENSG00000130592	LSP1	1.81739	-0.897827	0.00164536	3.3762	0.897827	0.00164536
ENSG00000104951	IL4I1	0.147356	-1.78064	0.00220133	0.540192	1.78064	0.00220133
ENSG00000107551	RASSF4	0.405228	-1.27066	0.00308948	0.99509	1.27066	0.00308948
ENSG00000227507	LTB	0.785897	-1.0119	0.0051109	1.59214	1.0119	0.0051109
ENSG00000110777	POU2AF1	0.294711	-1.3612	0.0051109	0.778302	1.3612	0.0051109
ENSG00000110446	SLC15A3	0.392948	-1.22915	0.00627534	0.938228	1.22915	0.00627534
ENSG00000197746	PSAP	6.40997	-0.720503	0.00680514	10.4875	0.720503	0.00680514
ENSG00000090104	RGS1	2.87344	-0.803531	0.00841033	4.98966	0.803531	0.00841033
ENSG00000173369	C1QB	0.761338	-0.991247	0.00853903	1.52107	0.991247	0.00853903
ENSG00000117984	CTSD	1.78055	-0.813588	0.00865024	3.12032	0.813588	0.00865024
ENSG00000144136	SLC20A1	2.38225	-0.754635	0.00933279	4.00168	0.754635	0.00933279
ENSG00000084070	SMAP2	0.638541	-1.02325	0.0104576	1.30783	1.02325	0.0104576
ENSG00000172216	CEBPB	2.16122	-0.803212	0.0104576	3.75646	0.803212	0.0104576
ENSG00000115414	FN1	29.7781	-0.71795	0.0116477	48.5746	0.71795	0.0116477
ENSG00000038945	MSR1	0.306991	-1.26472	0.0126845	0.756979	1.26472	0.0126845
ENSG00000172893	DHCR7	0.994651	-0.888509	0.0132708	1.84447	0.888509	0.0132708
ENSG00000102575	ACP5	0.491186	-1.08046	0.0164029	1.05195	1.08046	0.0164029
ENSG00000269404	SPIB	0.294711	-1.30094	0.0168503	0.746317	1.30094	0.0168503
ENSG00000188001	TPRG1	0.270152	-1.30004	0.0170464	0.685901	1.30004	0.0170464
ENSG00000105327	BBC3	0.626262	-0.990859	0.0189939	1.25452	0.990859	0.0189939
ENSG00000211772	TRBC2	0.871854	-0.963662	0.0195227	1.70587	0.963662	0.0195227
ENSG00000090382	LYZ	8.21508	-0.655057	0.0226831	12.8402	0.655057	0.0226831
ENSG00000100906	NFKBIA	2.61556	-0.690461	0.0249223	4.2007	0.690461	0.0249223
ENSG00000121966	CXCR4	2.73836	-0.752845	0.0258499	4.59163	0.752845	0.0258499
ENSG00000130208	APOC1	1.01921	-0.908192	0.0258499	1.91555	0.908192	0.0258499
ENSG00000179094	PER1	0.749058	-0.902492	0.0296328	1.40734	0.902492	0.0296328
ENSG00000135047	CTSL	0.552584	-0.985534	0.0301591	1.10526	0.985534	0.0301591
ENSG00000128815	WDFY4	0.0245593	-2.52137	0.0332684	0.206126	2.52137	0.0332684
ENSG00000008517	IL32	6.29945	-0.605009	0.0365085	9.51377	0.605009	0.0365085
ENSG00000169429	CXCL8	0.920973	-0.879648	0.037438	1.69876	0.879648	0.037438
ENSG00000204472	AIF1	0.405228	-1.06104	0.0375611	0.860042	1.06104	0.0375611
ENSG00000262406	MMP12	0.0859575	-1.77828	0.0375611	0.330512	1.77828	0.0375611
ENSG00000120708	TGFBI	1.03149	-0.794442	0.043889	1.79116	0.794442	0.043889
ENSG00000141526	SLC16A3	0.859575	-0.83217	0.0441159	1.53528	0.83217	0.0441159
ENSG00000058085	LAMC2	2.40681	-0.738633	0.0462622	3.99813	0.738633	0.0462622
ENSG00000123689	G0S2	0.478906	-1.17789	0.0467732	1.09815	1.17789	0.0467732
ENSG00000170855	TRIAP1	0.0982371	-1.65368	0.0467732	0.341174	1.65368	0.0467732
ENSG00000028137	TNFRSF1B	0.380669	-1.05658	0.0472599	0.806733	1.05658	0.0472599
ENSG00000162511	LAPTM5	1.60863	-0.70873	0.0475926	2.62277	0.70873	0.0475926
ENSG00000102265	TIMP1	19.8685	-0.611634	0.0495334	30.1121	0.611634	0.0495334

## Sheet: Colorectal cancer site P17
DEG between spots with a gene feature of THC *CD68 or CD4 with CTLA4 ) and spots with a gene feature of tumor-immune cells (CD3D, CD3E or CD3G)
FeatureID	FeatureName	CD3 Average	CD3 Log2 Fold Change	CD3 P-Value	CD68 or CD4 with CTLA4 Average	CD68 or CD4 with CTLA4 Log2 Fold Change	CD68 or CD4 with CTLA4 P-Value
ENSG00000129226	CD68	0	-8.07611	7.96095e-22	1.3765	8.07611	7.96095e-22
ENSG00000163599	CTLA4	0.0357709	-4.44695	6.6463e-16	0.88575	4.44695	6.6463e-16
ENSG00000010610	CD4	0	-6.42758	1.25955e-08	0.430905	6.42758	1.25955e-08

## Sheet: Liver metastasis site P17
DEG between spots with a gene feature of THC *CD68 or CD4 with CTLA4 ) and spots with a gene feature of tumor-immune cells (CD3D, CD3E or CD3G)
FeatureID	FeatureName	CD3 Average	CD3 Log2 Fold Change	CD3 P-Value	CD68 or CD4+CTLA4 Average	CD68 or CD4+CTLA4 Log2 Fold Change	CD68 or CD4+CTLA4 P-Value
ENSG00000010610	CD4	0	-8.17497	7.64803e-35	0.588741	8.17497	7.64803e-35
ENSG00000129226	CD68	0	-8.13844	2.09907e-34	0.573836	8.13844	2.09907e-34
ENSG00000163599	CTLA4	0.0307775	-4.438	6.71175e-24	0.70798	4.438	6.71175e-24
ENSG00000211896	IGHG1	0.410367	-1.59431	0.0322028	1.24455	1.59431	0.0322028
